# Supplementary material for: Two polysaccharides from Rehmannia glutinosa: isolation, structural characterization, and hypoglycemic activities
Source: Royal Society of Chemistry journal article supplement (doi:10.1039/d3ra05677e), 2023-01-01

Supplementary Figure

Fig.S1

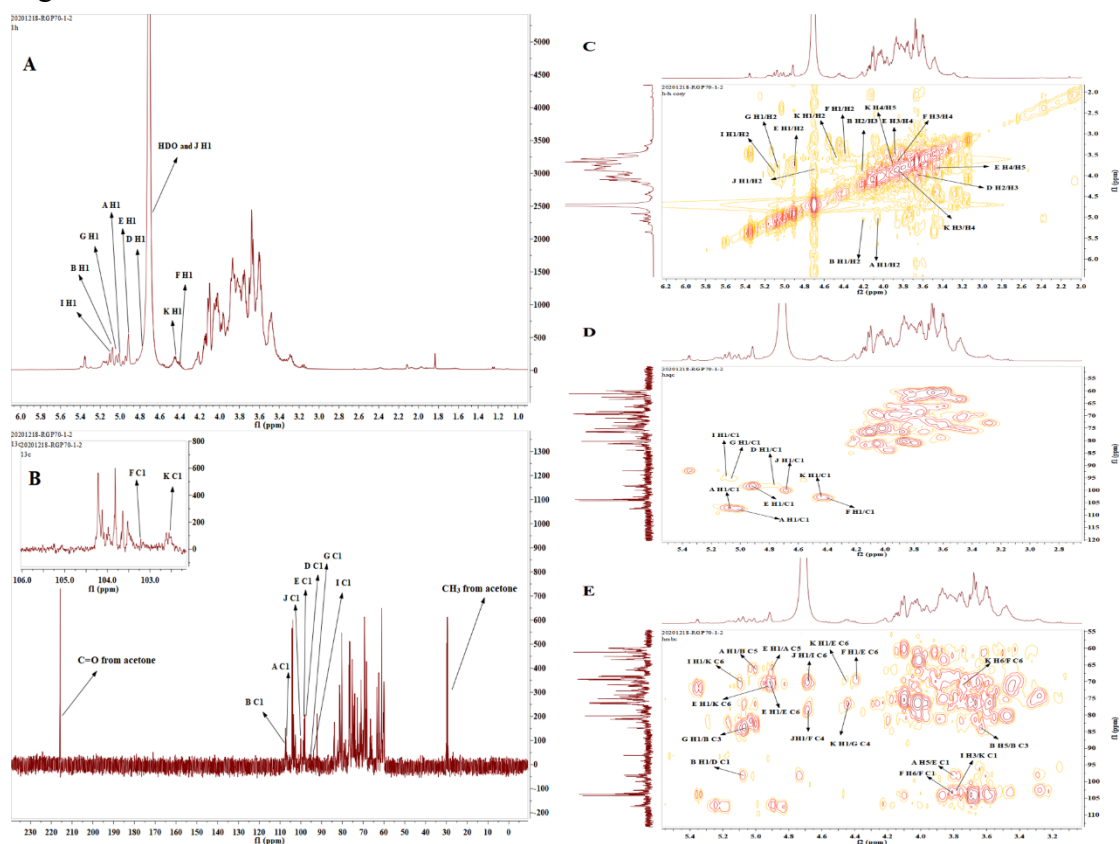

Fig.S1  $^1\text{H}$ -NMR (A),  $^{13}\text{C}$ -NMR (B),  $^1\text{H}$ - $^1\text{H}$  COSY (C), HSQC (D) and HMBC (E) spectra of RGP70-1-2.

Supplementary Tables

Table S1 The chromatographic conditions of HPLC

|                        |                                                                        |
|------------------------|------------------------------------------------------------------------|
| chromatographic column | Agilent ZORBAX Eclipse XDB-C18 (5 $\mu\text{m}$ , 4.6 $\times$ 250 mm) |
| mobile phase           | water-acetonitrile-phosphate buffer solution (0.05 M, pH 6.72)         |
| flow rate              | 1 mL/min                                                               |
| Injection volume       | 10 $\mu\text{M}$                                                       |
| detection wavelength   | 250 nm                                                                 |

Table S2 The program of HPLC gradient elution

| Time/min | Water/% | Acetonitrile/% | phosphate buffer solution/% |
|----------|---------|----------------|-----------------------------|
| 0        | -       | 17             | 83                          |
| 24       | -       | 17             | 83                          |
| 25       | -       | 19             | 81                          |
| 30       | -       | 18             | 82                          |
| 31       | 5       | 14             | 81                          |
| 32       | 5       | 14             | 81                          |
| 33       | -       | 18             | 82                          |
| 34       | 5       | 14             | 81                          |
| 36       | -       | 18             | 82                          |

Table S3 Infrared Spectral Characteristic Absorption Peaks of RGP70-1-1 and RGP70-1-2

| Wave number(cm <sup>-1</sup> ) | Functional group                                     |
|--------------------------------|------------------------------------------------------|
| 3410                           | O-H <sup>1</sup>                                     |
| 2933                           | C-H <sup>2</sup>                                     |
| 1693                           | C-C <sup>3</sup>                                     |
| 1421                           | C-H <sup>3</sup>                                     |
| 1264, 1241                     | C-O <sup>4</sup>                                     |
| 1067, 1027, 1064               | C-O-C of sugar ring and Glycosidic bond <sup>5</sup> |
| 875                            | $\alpha$ -glycosidic bond <sup>5</sup>               |
| 807, 805                       | C-H of the furan ring <sup>6</sup>                   |
| 613                            | O-H <sup>6</sup>                                     |

Table S4 The results of methylation analysis of RGP70-1-1

| Retention time | PMAA | Type of linkage | Mass fragments(m/z) | Molar ratios |
|----------------|------|-----------------|---------------------|--------------|
|----------------|------|-----------------|---------------------|--------------|

|       |                                                                               |                      |                                                                        |     |
|-------|-------------------------------------------------------------------------------|----------------------|------------------------------------------------------------------------|-----|
| 12.33 | 1,4-di- <i>O</i> -acetyl-<br>2,3,5-tri- <i>O</i> -methyl-<br>L-arabinitol     | L-Araf-(1→           | 43, 59, 71, 87, 101,<br>117, 129, 145, 161                             | 6.2 |
| 14.41 | 1,3,4-tri- <i>O</i> -acetyl-<br>2,5-di- <i>O</i> -methyl-L-<br>arabinitol     | →3)-L-Araf-<br>(1→   | 43, 58, 71, 87, 99, 117,<br>129, 147, 159, 173,<br>201, 233            | 1.4 |
| 15.13 | 1,4,5-tri- <i>O</i> -acetyl-<br>2,3-di- <i>O</i> -methyl-L-<br>arabinitol     | →5)-L-Araf-<br>(1→   | 43, 58, 71, 87, 101,<br>117, 129, 161, 173, 189                        | 2.3 |
| 15.93 | 1,5-di- <i>O</i> -acetyl-<br>2,3,4,6-tetra- <i>O</i> -<br>methyl-D-mannitol   | D-Manp-(1→           | 43, 59, 71, 87, 101,<br>113, 117, 129, 145,<br>157, 161, 173, 189, 205 | 2.3 |
| 16.49 | 1,5-di- <i>O</i> -acetyl-<br>2,3,4,6-tetra- <i>O</i> -<br>methyl-D-galactitol | D-Galp-(1→           | 43, 59, 71, 87, 101,<br>117, 129, 145, 157,<br>161, 173, 189, 205      | 3.3 |
| 16.90 | 1,3,4,5-tetra- <i>O</i> -<br>acetyl-2- <i>O</i> -methyl-<br>L-arabinitol      | →3,5)-L-Araf-<br>(1→ | 43, 58, 74, 85, 99, 117,<br>127, 141, 159, 172,<br>187, 201, 217, 261  | 3.4 |
| 17.13 | 1,2,4,5-tetra- <i>O</i> -<br>acetyl-3- <i>O</i> -methyl-<br>L-arabinitol      | →2,5)-L-Araf-<br>(1→ | 43, 59, 74, 81, 87, 99,<br>113, 129, 145, 159,<br>172, 189             | 1.0 |
| 17.88 | 1,2,5-tri- <i>O</i> -acetyl-<br>3,4,6-tri- <i>O</i> -methyl-<br>D-mannitol    | →2)-D-Manp-<br>(1→   | 43, 59, 71, 87, 99, 117,<br>129, 141, 161, 171, 189                    | 1.6 |
| 18.06 | 1,4,5-tri- <i>O</i> -acetyl-<br>2,3,6-tri- <i>O</i> -methyl-<br>D-mannitol    | →4)-D-Manp-<br>(1→   | 43, 59, 71, 87, 101,<br>117, 129, 143, 161,<br>173, 189, 203, 233, 277 | 1.0 |
| 18.33 | 1,4,5-tri- <i>O</i> -acetyl-<br>2,3,6-tri- <i>O</i> -methyl-<br>D-galactitol  | →4)-D-Galp-<br>(1→   | 43, 57, 71, 87, 99, 117,<br>131, 142, 157, 173,<br>187, 203, 233       | 4.0 |
| 18.54 | 1,5,6-tri- <i>O</i> -acetyl-<br>2,3,4-tri- <i>O</i> -methyl-<br>D-glucitol    | →6)-D-Glcp-<br>(1→   | 43, 58, 71, 87, 99, 101,<br>117, 129, 143, 159,<br>161, 173, 189, 233  | 3.7 |
| 20.11 | 1,4,5,6-tetra- <i>O</i> -<br>acetyl-2,3-di- <i>O</i> -<br>methyl-D- glucitol  | →4,6)-D-<br>Glcp-(1→ | 43, 58, 74, 85, 101,<br>117, 127, 142, 161,<br>171, 187, 201, 231, 261 | 1.7 |
| 20.22 | 1,4,5,6-tetra- <i>O</i> -<br>acetyl-2,3-di- <i>O</i> -<br>methyl-D-galactitol | →4,6)-D-<br>Galp-(1→ | 43, 58, 85, 101, 117,<br>129, 142, 159, 187,<br>201, 231, 261          | 1.5 |

|       |                                                                     |                  |                                                                  |     |
|-------|---------------------------------------------------------------------|------------------|------------------------------------------------------------------|-----|
| 20.85 | 1,3,5,6-tetra- <i>O</i> -acetyl-2,4-di- <i>O</i> -methyl-D-glucitol | →3,6)-D-Glcp-(1→ | 43, 58, 74, 87, 101, 117, 129, 139, 159, 173, 189, 233, 245, 305 | 1.7 |
|-------|---------------------------------------------------------------------|------------------|------------------------------------------------------------------|-----|

PMAA: Partially Methylated Alditol Acetate

Table S5 The results of methylation analysis of RGP70-1-2

| Retention time | PMAA                                                                  | Type of linkage  | Mass fragments(m/z)                                             | Molar ratios |
|----------------|-----------------------------------------------------------------------|------------------|-----------------------------------------------------------------|--------------|
| 15.81          | 1,4,5-tri- <i>O</i> -acetyl-2,3-di- <i>O</i> -methyl-L-arabinitol     | →5)-L-Araf-(1→   | 43, 58, 71, 87, 101, 117, 129, 161, 173, 189                    | 1.0          |
| 16.71          | 1,5-di- <i>O</i> -acetyl-2,3,4,6-tetra- <i>O</i> -methyl-D-glucitol   | D-Glcp-(1→       | 43, 59, 71, 87, 101, 117, 129, 145, 161, 205                    | 1.7          |
| 17.29          | 1,5-di- <i>O</i> -acetyl-2,3,4,6-tetra- <i>O</i> -methyl-D-galactitol | D-Galp-(1→       | 43, 59, 71, 87, 101, 117, 129, 145, 157, 161, 173, 191, 205     | 2.6          |
| 17.66          | 1,3,4,5-tetra- <i>O</i> -acetyl-2- <i>O</i> -methyl-L-arabinitol      | →3,5)-L-Araf-(1→ | 43, 58, 74, 85, 99, 117, 127, 141, 159, 172, 187, 201, 217, 261 | 1.4          |
| 19.02          | 1,4,5-tri- <i>O</i> -acetyl-2,3,6-tri- <i>O</i> -methyl-D-mannitol    | →4)-D-Manp-(1→   | 43, 59, 71, 87, 101, 117, 129, 143, 161, 173, 203, 233, 277     | 1.2          |
| 19.36          | 1,5,6-tri- <i>O</i> -acetyl-2,3,4-tri- <i>O</i> -methyl-D-glucitol    | →6)-D-Glcp-(1→   | 43, 59, 71, 87, 99, 101, 117, 129, 143, 159, 173, 189, 233      | 3.4          |
| 20.03          | 1,5,6-tri- <i>O</i> -acetyl-2,3,4-tri- <i>O</i> -methyl-D-galactitol  | →6)-D-Galp-(1→   | 43, 59, 71, 87, 99, 117, 129, 143, 159, 173, 189, 233           | 3.2          |
| 21.11          | 1,4,5,6-tetra- <i>O</i> -acetyl-2,3-di- <i>O</i> -methyl-D-glucitol   | →4,6)-D-Glcp-(1→ | 43, 58, 85, 101, 117, 127, 142, 159, 187, 201, 231, 261, 305    | 1.7          |
| 21.62          | 1,3,5,6-tetra- <i>O</i> -acetyl-2,4-di- <i>O</i> -                    | →3,6)-D-Manp-(1→ | 43, 58, 74, 87, 117, 129, 139, 159, 173, 189, 207,              | 1.1          |

References

- 1 J. Zhou, J. Gong, Y. Chai, D. Li, C. Zhou, C. Sun and J. M. Regenstein, *Glycoconj. J.*, 2022, **39**, 513–523.
- 2 Y. Zhang, Z. Chen, Z. Huang, Z. Wu, J. Xu and K. Wang, *Food Funct.*, 2019, **10**, 6720–6731.
- 3 H. Wang, J. Chen, P. Ren, Y. Zhang and S. Omondi Onyango, *Ultrason. Sonochem.*, 2021, **70**, 105355.
- 4 P. Ji, Y. Wei, W. Xue, Y. Hua, M. Zhang, H. Sun, Z. Song, L. Zhang, J. Li, H. Zhao and W. Zhang, *Int. J. Biol. Macromol.*, 2014, **67**, 195–200.
- 5 A. Sknepnek, S. Tomić, D. Miletić, S. Lević, M. Čolić, V. Nedović and M. Nikšić, *Food Chem.*, 2021, **342**, 128344.
- 6 J. Chen, L. Li, X. Zhou, P. Sun, B. Li and X. Zhang, *Food Funct.*, 2018, **9**, 6337–6348.

## Isolation, Structural characterization, and Hypoglycemic Activities

The file includes:

All original images for western blot

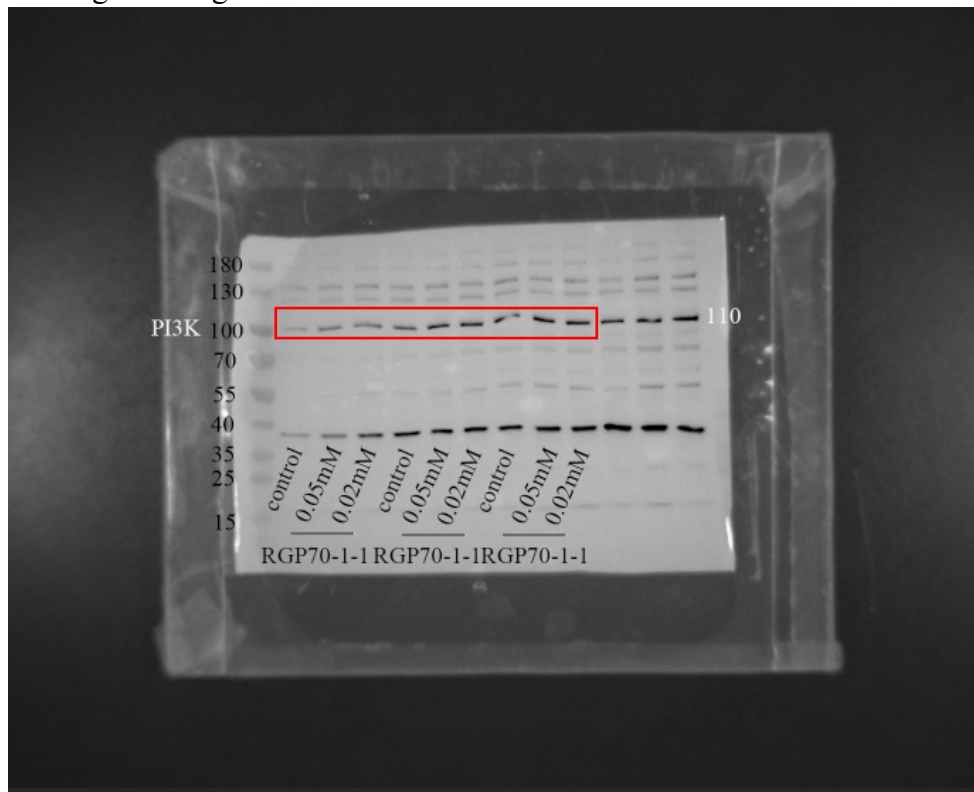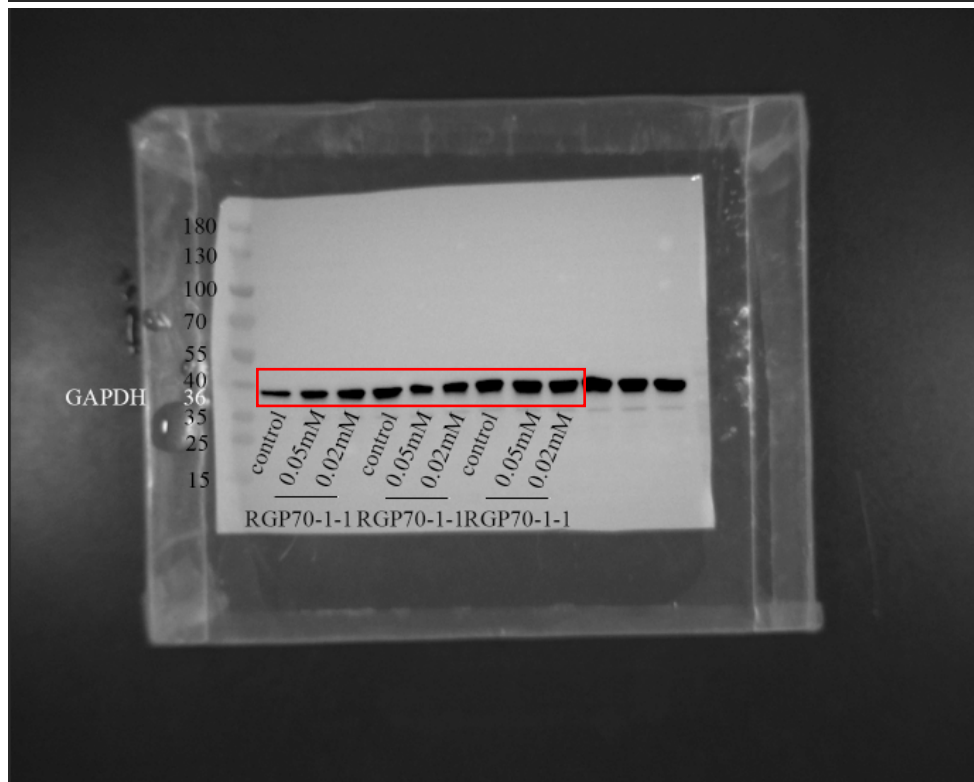

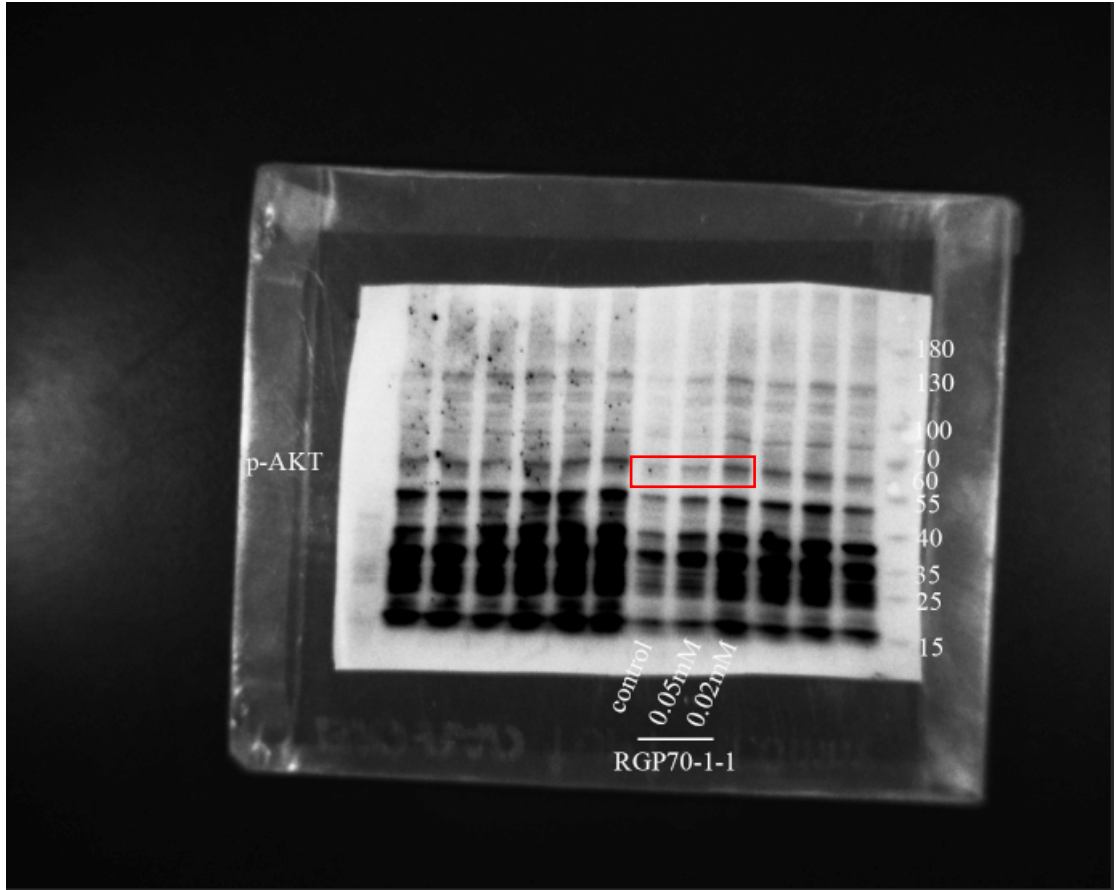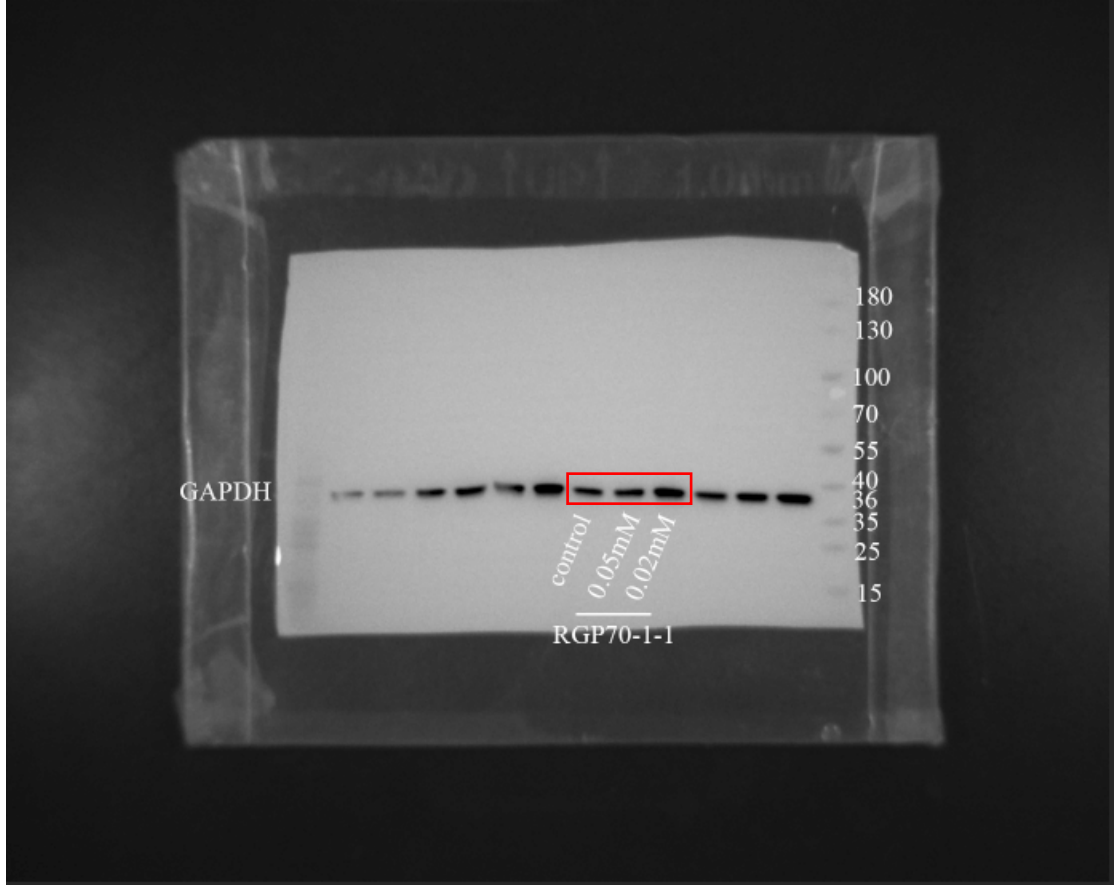

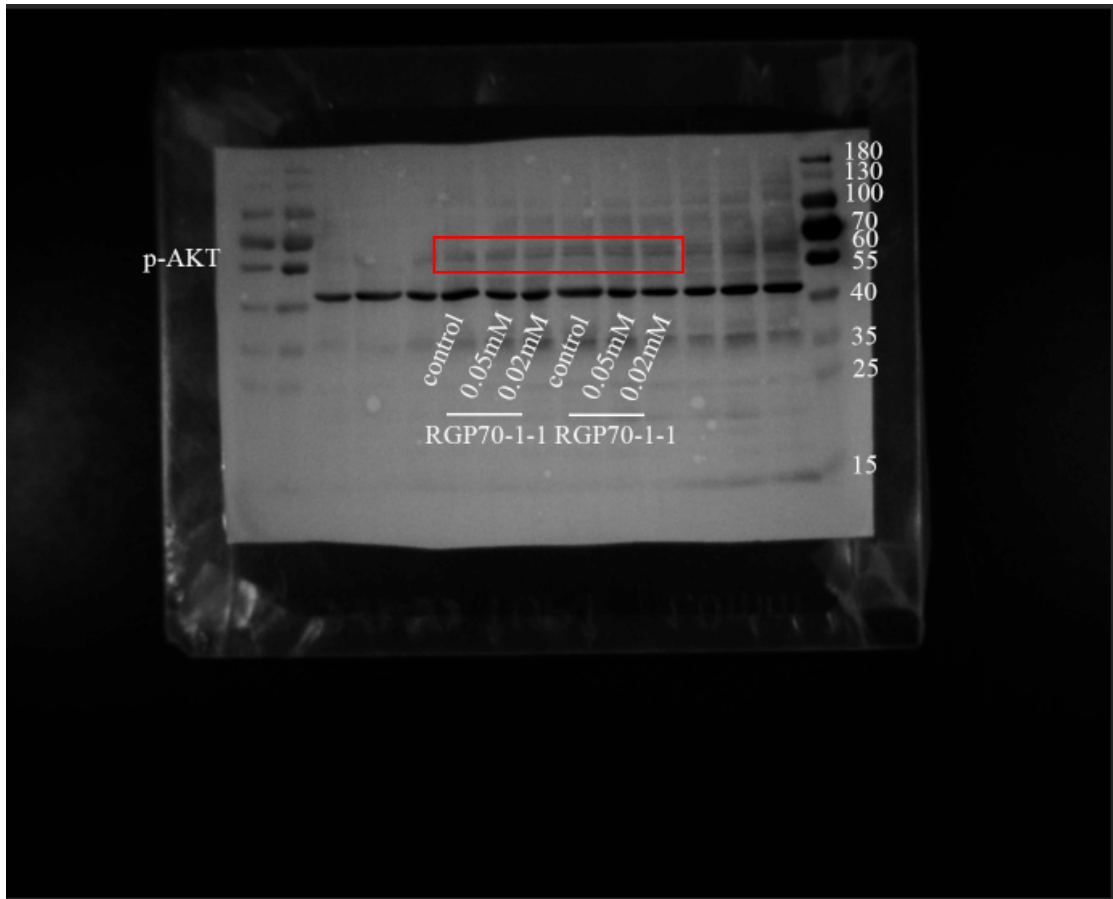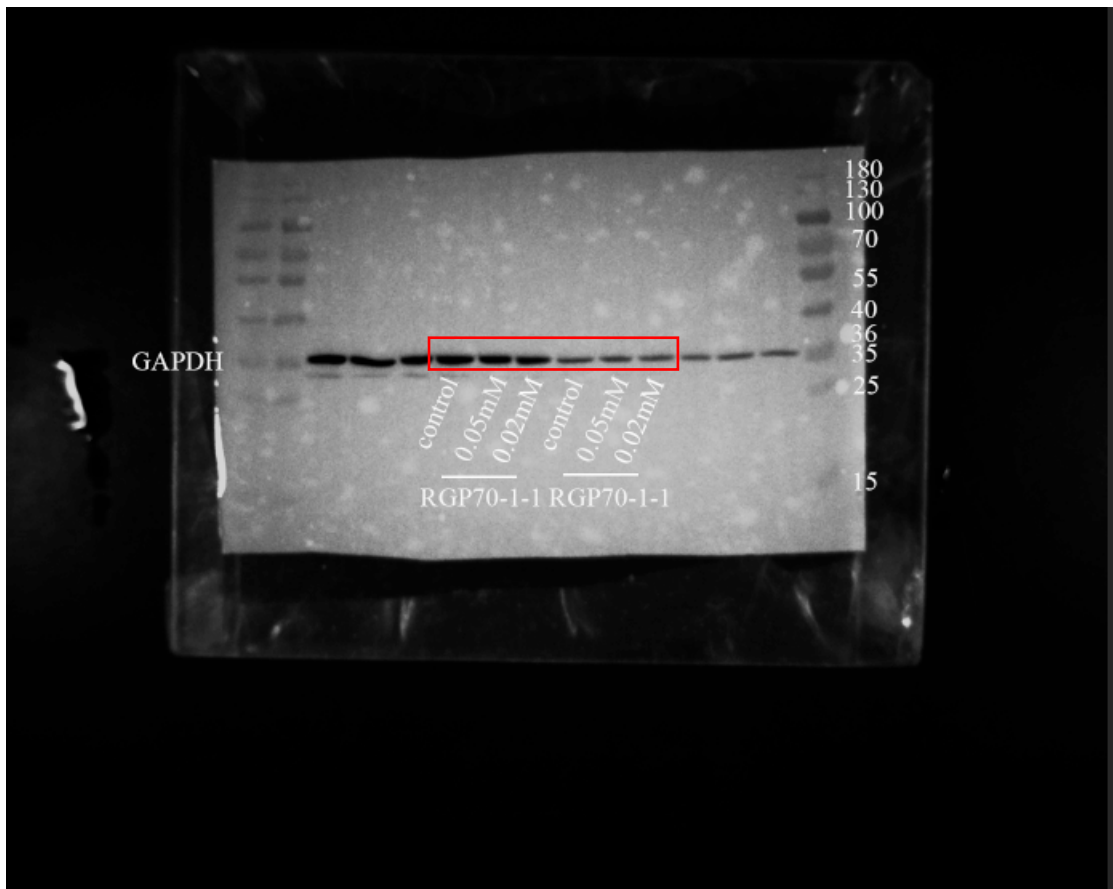

Supplement: d3ra05677e1.pdf [file d3ra05677e1.pdf]
